# Supplementary material
Source: PubMed Central journal article supplement (PMC6484136)
Supplement: supp_RA118.005765_140634_2_supp_286778_pmxr5s.pdf [file supp_RA118.005765_140634_2_supp_286778_pmxr5s.pdf]

## **SUPPORTING INFORMATION**

**Title:** Polyglutamylation of tubulin's C-terminal tail controls pausing and motility of kinesin-3 family member KIF1A

**Authors:** Dominique V. Lessard<sup>1</sup>, Oraya J. Zinder<sup>1</sup>, Takashi Hotta<sup>2</sup>, Kristen J. Verhey<sup>2</sup>, Ryoma Ohi<sup>2</sup>, Christopher L. Berger<sup>1</sup>

<sup>1</sup> Department of Molecular Physiology & Biophysics, University of Vermont, Burlington, VT 05405

<sup>2</sup> Department of Cell and Developmental Biology, University of Michigan Medical School, Ann Arbor, MI 48109

### **Materials Included:**

Supplemental Movie 1 (uploaded separately)

Supplemental Movie 1 Legend

Supplemental Figures and Legends 1-7

Supplemental References

## SI FIGURES

**Movie S1.** Sample motility of KIF1A on taxol-stabilized microtubules. TIRF microscopy was used to observe the motility of KIF1A-LZ-3xmCitrine on rhodamine labeled, taxol-stabilized microtubules. 500 frames were recorded at 5 fps, shown here at 25 fps. Data was analyzed as described in the Methods section.

**Figure S1.**

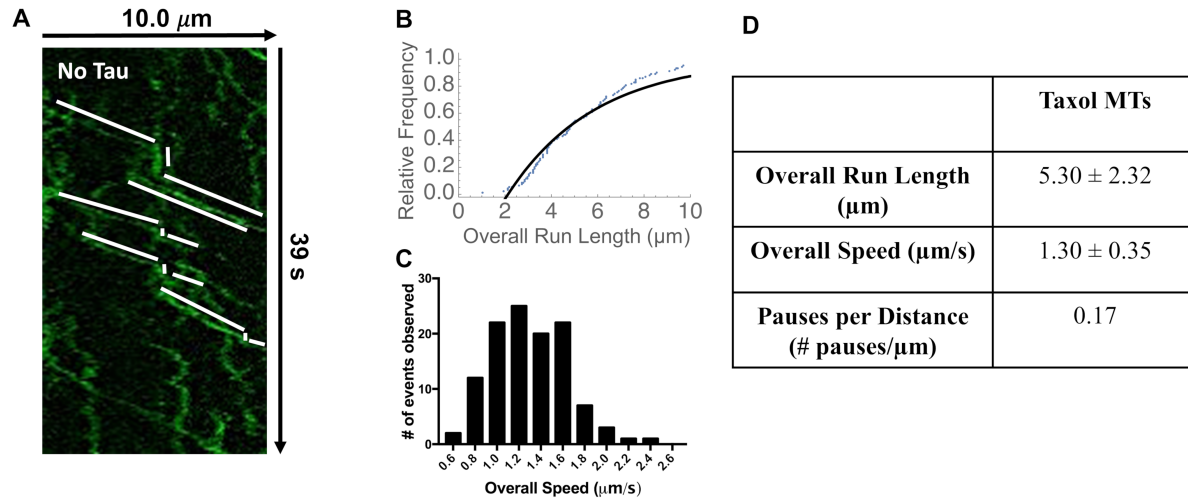

**Figure S1. The LZ does not influence KIF1A pausing behavior.** **A)** Representative kymograph of the non-leucine zipper KIF1A construct (KIF1A[1-396]-GFP) on taxol-stabilized microtubules. KIF1A-GFP undergoes extensive pausing behavior during a single overall run (outlined in white). There are also many purely diffusive events of KIF1A molecules not stabilized by the leucine zipper, presumably monomeric motors [1]. **B)** Quantification of overall run length displayed as cumulative frequency plot. **C)** Histogram of overall speed. **D)** Summary of KIF1A-GFP motility and behavior on taxol-stabilized microtubules. KIF1A-GFP exhibits an overall run length (ORL) of  $5.30 \pm 2.32 \mu\text{m}$  [ $n=123$ ], an overall speed of  $1.30 \pm 0.35 \mu\text{m/s}$  [ $n=123$ ] and exhibits 0.17 pauses/ $\mu\text{m}$ . Run length values and standard deviations were calculated as previously reported [2]. Each condition is representative of at least four independent experiments. Mean  $\pm$  SD reported.

**Figure S2.**

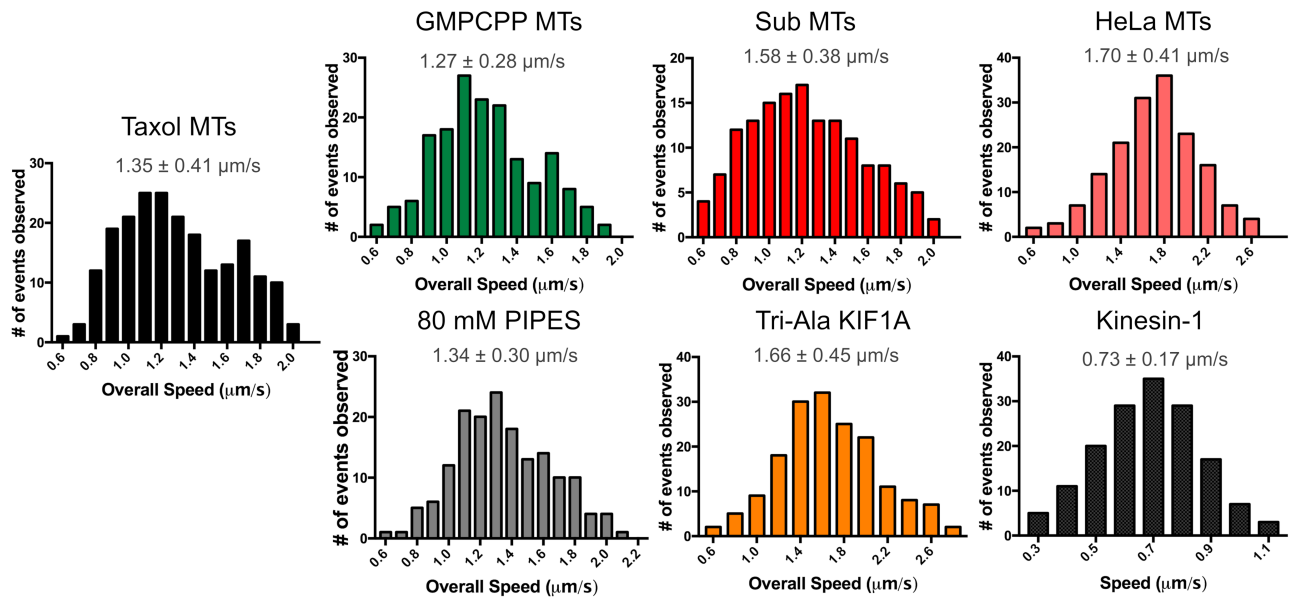

**Figure S2. Histograms of overall speed across all conditions** The Mean  $\pm$  SD for each condition is presented above each graph.

Figure S3.

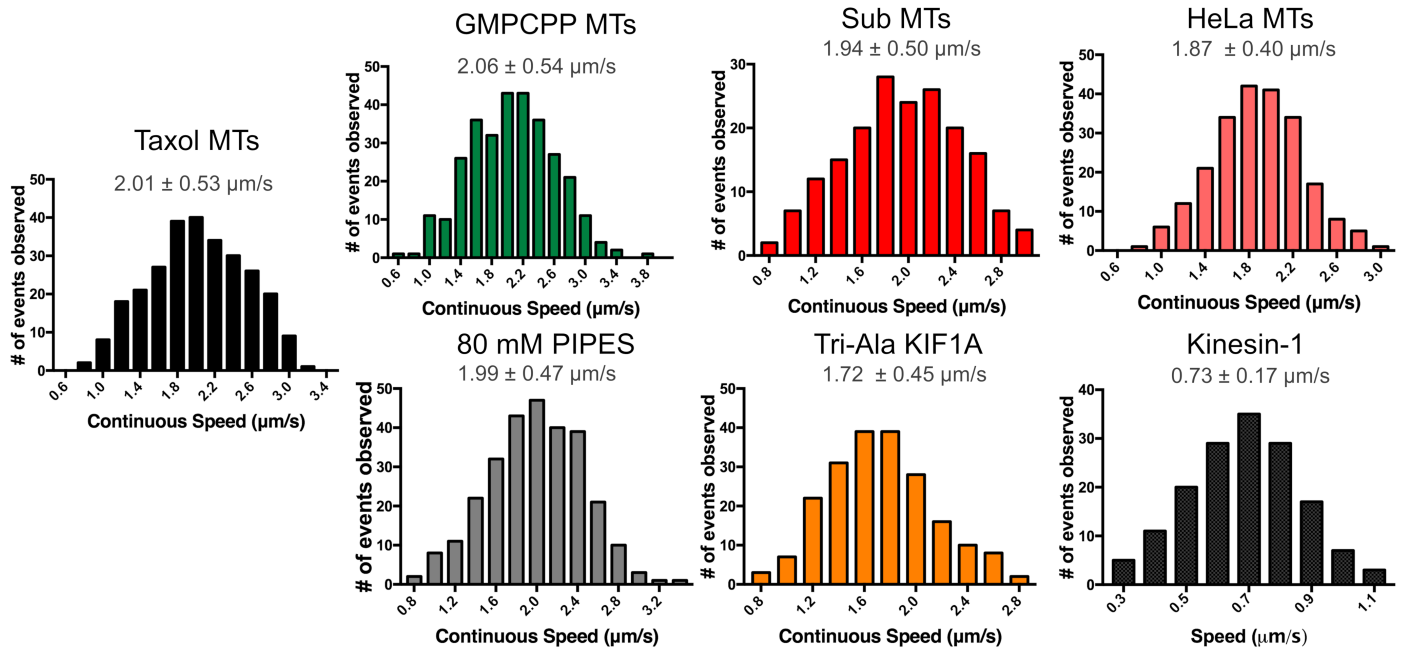

Figure S3. Histograms of continuous speed across all conditions. The Mean  $\pm$  SD for each condition is presented above each graph.

**Figure S4.**

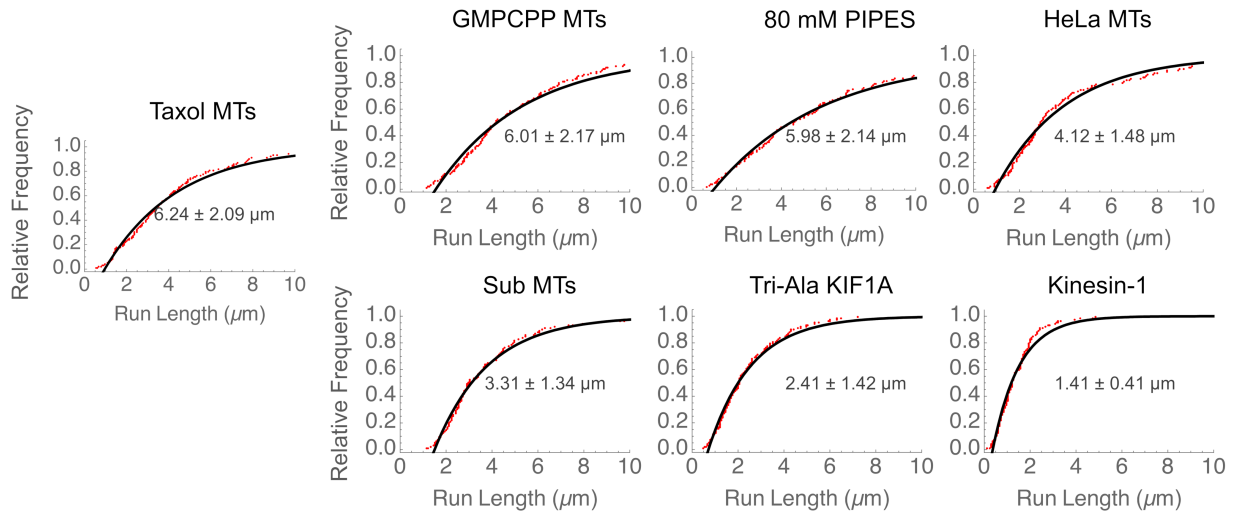

**Figure S4. Cumulative frequency plots of overall run length across all conditions.** Black dots represent the raw run length and red dots represent the observed cumulative frequency. Kinesin-1 was used as an experimental control; run length of kinesin-1 is reported. The mean overall run length was calculated as previously reported [2] and is shown within each graph (Mean  $\pm$  SD).

**Figure S5.**

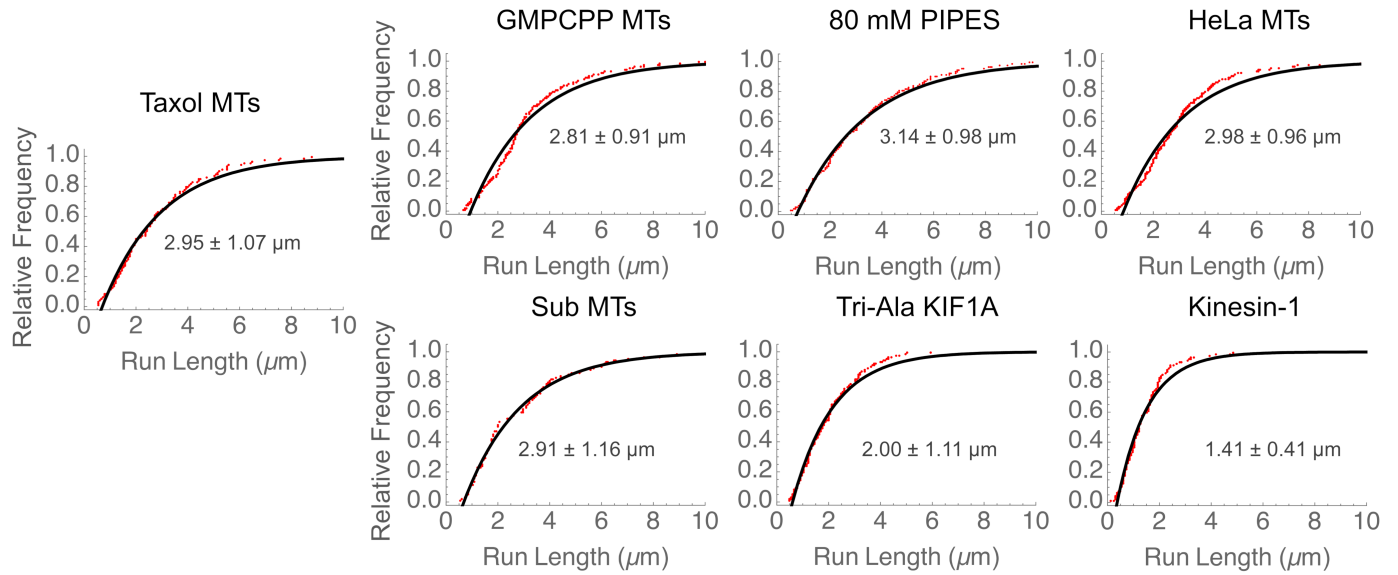

**Figure S5. Cumulative frequency plots of continuous run length across all conditions.** Black dots represent the raw run length and red dots represent the observed cumulative frequency. Kinesin-1 was used as an experimental control; run length of kinesin-1 is reported. A continuous run length was calculated as previously reported [2] and is shown within each graph (Mean  $\pm$  SD).

Figure S6.

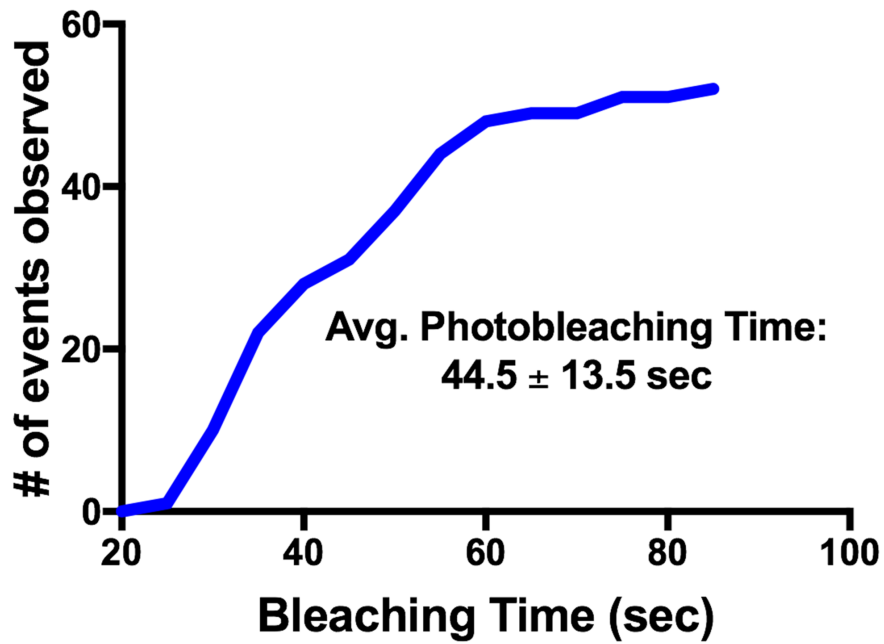

**Figure S6. Photobleaching assay measuring average KIF1A-LZ-3xmCitrine bleaching time.** KIF1A motors in an AMPPNP nucleotide state were imaged using TIRF microscopy. Fluorescence intensity over time of individual motors was measured and corrected for channel background noise. Mean  $\pm$  SD reported.



Figure S7.

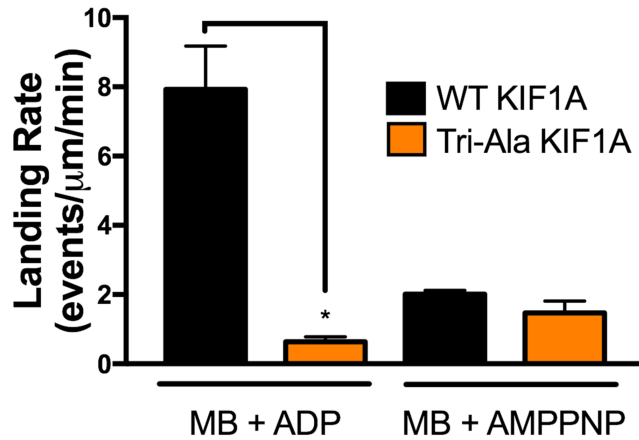

|               | MB + ADP     | MB + AMPPNP  |
|---------------|--------------|--------------|
| WT KIF1A      | 7.93 ± 1.25  | 2.01 ± 0.49  |
| Tri-Ala KIF1A | 0.64 ± 0.14* | 1.47 ± 0.34* |

**Figure S7. Comparison of WT and Tri-Ala KIF1A landing rates in the ADP vs AMPPNP state.** In motility buffer supplemented with ADP as the available nucleotide (MB + ADP), WT KIF1A had a landing rate of  $7.93 \pm 1.25$  events/ $\mu\text{m}/\text{min}$  ( $n=1552$ ) while Tri-Ala KIF1A had a landing rate of  $0.64 \pm 0.14$  events/ $\mu\text{m}/\text{min}$  ( $n=527$ ). In motility buffer supplemented with AMPPNP (MB + AMPPNP), WT KIF1A had a landing rate of  $2.01 \pm 0.49$  events/ $\mu\text{m}/\text{min}$  ( $n=917$ ) while Tri-Ala KIF1A had a landing rate of  $1.47 \pm 0.34$  events/ $\mu\text{m}/\text{min}$  ( $n=574$ ). Mean  $\pm$  SD reported. \* =  $p < 0.001$  relative to WT KIF1A under corresponding condition.

## SUPPLEMENTAL REFERENCES

1. Soppina, V., et al., *Dimerization of mammalian kinesin-3 motors results in superprocessive motion*. Proc Natl Acad Sci U S A, 2014. **111**(15): p. 5562-7.
2. Thompson, A.R., G.J. Hoeprich, and C.L. Berger, *Single-molecule motility: statistical analysis and the effects of track length on quantification of processive motion*. Biophys J, 2013. **104**(12): p. 2651-61.
